# Supplementary material for: PD-L1 Blockade Differentially Impacts Regulatory T Cells from HIV-Infected Individuals Depending on Plasma Viremia
Source: PubMed Central journal article supplement (PMC4669187; doi:10.1371/journal.ppat.1005270), 2015-12-03
Supplement: ppat.1005270.s001.pdf [file ppat.1005270.s001.pdf]

**S1 Table. Comparison of demographic characteristics of HIV-infected individuals and healthy controls used in Fig 1**

|                              | for PD-1 staining     |                          |                      | for PD-L1 staining    |                          |                      |
|------------------------------|-----------------------|--------------------------|----------------------|-----------------------|--------------------------|----------------------|
|                              | HIV patients<br>n= 46 | Healthy Controls<br>n= 9 | p-value <sup>a</sup> | HIV patients<br>n= 23 | Healthy Controls<br>n= 7 | p-value <sup>a</sup> |
| <b>age</b> (years) mean ± SD | 39.43± 8.65           | 36.11± 12.81             | 0,3389               | 37.22± 8.92           | 39.71± 11.64             | 0,539                |
| <b>Sex</b> , male: female    | 33:13                 | 3:6                      | NA                   | 21:2                  | 4:3                      | NA                   |

<sup>a</sup> p-values were calculated by Mann-Whitney test

NA not applicable
