# Supplementary material for: PD-L1 Blockade Differentially Impacts Regulatory T Cells from HIV-Infected Individuals Depending on Plasma Viremia
Source: PubMed Central journal article supplement (PMC4669187; doi:10.1371/journal.ppat.1005270), 2015-12-03
Supplement: ppat.1005270.s002.pdf [file ppat.1005270.s002.pdf]

**S2 Table. Characteristics of HIV-infected individuals**

|                                                         | < 500 CD4/ $\mu$ L<br>> 2000 vRNA/mL<br>n=11 | > 500 CD4/ $\mu$ L<br>> 2000 vRNA/mL<br>n=11 | > 500 CD4/ $\mu$ L<br>< 2000 vRNA/mL<br>n=10 | HAART<br>n=14                  | p-value <sup>a</sup> |
|---------------------------------------------------------|----------------------------------------------|----------------------------------------------|----------------------------------------------|--------------------------------|----------------------|
| <b>age</b> (years) mean $\pm$ SD                        | 32.55 $\pm$ 5.3                              | 42.09 $\pm$ 8.5                              | 39.3 $\pm$ 9.6                               | 42.86 $\pm$ 7.6                | 0,0367               |
| <b>Sex</b> , male: female                               | 10:1                                         | 7:4                                          | 8:2                                          | 8:6                            | NA                   |
| <b>CD4 count</b> (cells/ $\mu$ L) Median, IQR (25-75%)  | 267 (150-365)                                | 624 (543-696) <sup>^</sup>                   | 704 (594-787) <sup>^</sup>                   | 780 (606-869) <sup>^</sup>     | <0.0001              |
| <b>viral RNA</b> (LOG10 copies/mL) Median, IQR (25-75%) | 4.69 (4.32-4.9) <sup>+</sup>                 | 4.48 (3.6-5.1) <sup>+</sup>                  | 2.3 (1.89-2.48) <sup>++</sup>                | 1.57 (1.57-1.57) <sup>++</sup> | <0.0001              |
| <b>Hepatitis C</b> , positive: negative                 | 3:8                                          | 0:11                                         | 0:10                                         | 4:10                           | NA                   |
| <b>Hepatitis B</b> , positive: negative                 | 01:10                                        | 00:11                                        | 00:10                                        | 01:13                          | NA                   |

<sup>a</sup> p-values were calculated by Kruskal-Wallis to compare the 4 HIV study groups

<sup>^</sup> non significant differences in CD4 count between the indicated groups (Kruskal Wallis test , p-value:0.3371)

<sup>+</sup> non significant differences in viral RNA between the indicated groups (Mann Whitney test, p-value: 0.5326)

<sup>++</sup> significant differences in viral RNA between the indicated groups (Mann Whitney test, p-value: <0.0001)

NA not applicable

vRNA: viral RNA
