# Supplementary material for: PD-L1 Blockade Differentially Impacts Regulatory T Cells from HIV-Infected Individuals Depending on Plasma Viremia
Source: PubMed Central journal article supplement (PMC4669187; doi:10.1371/journal.ppat.1005270), 2015-12-03
Supplement: ppat.1005270.s003.pdf [file ppat.1005270.s003.pdf]

**S3 Table. Viral loads and CD4 T cell counts from HIV-infected individuals studied longitudinally**

| Group A      |          | CD4 count<br>(cells/ $\mu$ L) | viral RNA<br>(copies/mL) | Group B      |          | CD4 count<br>(cells/ $\mu$ L) | viral RNA<br>(copies/mL) |
|--------------|----------|-------------------------------|--------------------------|--------------|----------|-------------------------------|--------------------------|
| Individual 1 | pre-cART | 1169                          | 1850                     | Individual 1 | pre-cART | 550                           | 32061                    |
|              | on-cART  | 1704                          | 199                      |              | on-cART  | 524                           | 37                       |
|              | off-cART | 566                           | 22984                    | Individual 2 | pre-cART | 605                           | 4966                     |
|              | on-cART  | 1119                          | 37                       |              | on-cART  | 1006                          | 37                       |
| Individual 2 | pre-cART | 968                           | 110000                   | Individual 3 | pre-cART | 552                           | 33900                    |
|              | on-cART  | 941                           | 19                       |              | on-cART  | 775                           | 37                       |
|              | off-cART | 962                           | 4817                     | Individual 4 | pre-cART | 488                           | 265000                   |
|              | on-cART  | 966                           | 37                       |              | on-cART  | 434                           | 37                       |
| Individual 3 | pre-cART | 809                           | 4347                     | Individual 5 | pre-cART | 574                           | 309                      |
|              | on-cART  | 1100                          | 199                      |              | on-cART  | 1872                          | 199                      |
|              | off-cART | 595                           | 89300                    | Individual 6 | pre-cART | 968                           | 110000                   |
|              | on-cART  | 337                           | 37                       |              | on-cART  | 941                           | 19                       |
| Individual 4 | pre-cART | 462                           | 976                      | Individual 7 | pre-cART | 1169                          | 1850                     |
|              | on-cART  | 1331                          | 199                      |              | on-cART  | 1704                          | 199                      |
|              | off-cART | 885                           | 100000                   |              |          |                               |                          |
|              | on-cART  | 1744                          | 37                       |              |          |                               |                          |
| Individual 5 | pre-cART | 440                           | 7160                     |              |          |                               |                          |
|              | on-cART  | 577                           | 199                      |              |          |                               |                          |
|              | off-cART | 427                           | 25200                    |              |          |                               |                          |
|              | on-cART  | 956                           | 37                       |              |          |                               |                          |
